# Supplementary material for: Organic photosensitizers for antimicrobial phototherapy
Source: Royal Society of Chemistry journal article supplement (doi:10.1039/d1cs00647a), 2022-01-01
Supplement: d1cs00647a1.pdf [file d1cs00647a1.pdf]

## Ref. 14

**Aggregation-Induced Emission-Based Platforms for the Treatment of Bacteria, Fungi, and Viruses**  
Author: Xiaohui Chen, Haijie Han, Zhe Tang, et al  
Publication: Advanced Healthcare Materials  
Publisher: John Wiley and Sons  
Date: Jun 30, 2021  
© 2021 Wiley-VCH GmbH

**Order Completed**

Thank you for your order.

This Agreement between Ewha Womans University – Van-Nghia Nguyen ("You") and John Wiley and Sons ("John Wiley and Sons") consists of your license details and the terms and conditions provided by John Wiley and Sons and Copyright Clearance Center.

Your confirmation email will contain your order number for future reference.

|                                                                                            |                                                                                                |                                   |
|--------------------------------------------------------------------------------------------|------------------------------------------------------------------------------------------------|-----------------------------------|
| License Number                                                                             | 5236780498377                                                                                  | <a href="#">Printable Details</a> |
| License date                                                                               | Jan 26, 2022                                                                                   |                                   |
| <b>Licensed Content</b>                                                                    |                                                                                                |                                   |
| Licensed Content Publisher                                                                 | John Wiley and Sons                                                                            |                                   |
| Licensed Content Publication                                                               | Advanced Healthcare Materials                                                                  |                                   |
| Licensed Content Title                                                                     | Aggregation-Induced Emission-Based Platforms for the Treatment of Bacteria, Fungi, and Viruses |                                   |
| Licensed Content Author                                                                    | Xiaohui Chen, Haijie Han, Zhe Tang, et al                                                      |                                   |
| Licensed Content Date                                                                      | Jun 30, 2021                                                                                   |                                   |
| Licensed Content Volume                                                                    | 10                                                                                             |                                   |
| Licensed Content Issue                                                                     | 24                                                                                             |                                   |
| Licensed Content Pages                                                                     | 19                                                                                             |                                   |
| <b>Order Details</b>                                                                       |                                                                                                |                                   |
| Type of use                                                                                | Journal/Magazine                                                                               |                                   |
| Requestor type                                                                             | Publisher (STM Signatory)                                                                      |                                   |
| STM publisher name                                                                         | Royal Society of Chemistry                                                                     |                                   |
| Is the reuse sponsored by or associated with a pharmaceutical or medical products company? | no                                                                                             |                                   |
| Format                                                                                     | Print and electronic                                                                           |                                   |
| Portion                                                                                    | Figure/table                                                                                   |                                   |
| Number of figures/tables                                                                   | 1                                                                                              |                                   |
| Will you be translating?                                                                   | No                                                                                             |                                   |
| Circulation                                                                                | 1 - 29                                                                                         |                                   |
| <b>Additional Data</b>                                                                     |                                                                                                |                                   |
| Order reference number                                                                     | 14                                                                                             |                                   |
| Portions                                                                                   | Figure 4                                                                                       |                                   |
| <b>About Your Work</b>                                                                     |                                                                                                |                                   |
| Title of new article                                                                       | Organic photosensitizers for antimicrobial phototherapy                                        |                                   |
| Lead author                                                                                | Van-Nghia Nguyen, Zheng Zhao, Ben Zhong Tang and Juyoung Yoon                                  |                                   |
| Title of targeted journal                                                                  | Chemical Society Reviews                                                                       |                                   |
| Publisher                                                                                  | Royal Society of Chemistry                                                                     |                                   |

## Ref. 39

**Review Order**

Please review the order details and the associated terms and conditions.

No royalties will be charged for this reuse request although you are required to obtain a license and comply with the license terms and conditions. To obtain the license, click the Accept button below.

|                                                                                            |                                                                          |  |
|--------------------------------------------------------------------------------------------|--------------------------------------------------------------------------|--|
| <b>Licensed Content</b>                                                                    |                                                                          |  |
| Licensed Content Publisher                                                                 | John Wiley and Sons                                                      |  |
| Licensed Content Publication                                                               | Angewandte Chemie International Edition                                  |  |
| Licensed Content Title                                                                     | A Supramolecular Antibiotic Switch for Antibacterial Regulation          |  |
| Licensed Content Author                                                                    | Haotian Bai, Huanxiang Yuan, Chenyao Nie, et al                          |  |
| Licensed Content Date                                                                      | Aug 26, 2015                                                             |  |
| Licensed Content Volume                                                                    | 54                                                                       |  |
| Licensed Content Issue                                                                     | 45                                                                       |  |
| Licensed Content Pages                                                                     | 6                                                                        |  |
| <b>Order Details</b>                                                                       |                                                                          |  |
| Type of use                                                                                | Journal/Magazine                                                         |  |
| Requestor type                                                                             | Publisher (STM Signatory)                                                |  |
| STM publisher name                                                                         | Royal Society of Chemistry                                               |  |
| Is the reuse sponsored by or associated with a pharmaceutical or medical products company? | no                                                                       |  |
| Format                                                                                     | Print and electronic                                                     |  |
| Portion                                                                                    | Figure/table                                                             |  |
| Number of figures/tables                                                                   | 1                                                                        |  |
| Will you be translating?                                                                   | No                                                                       |  |
| Circulation                                                                                | 1 - 29                                                                   |  |
| <b>Additional Data</b>                                                                     |                                                                          |  |
| Order reference number                                                                     | 39                                                                       |  |
| Portions                                                                                   | Figure 5                                                                 |  |
| <b>About Your Work</b>                                                                     |                                                                          |  |
| Title of new article                                                                       | Organic photosensitizers for antimicrobial phototherapy                  |  |
| Lead author                                                                                | Van-Nghia Nguyen, Zheng Zhao, Ben Zhong Tang and Juyoung Yoon            |  |
| Title of targeted journal                                                                  | Chemical Society Reviews                                                 |  |
| Publisher                                                                                  | Royal Society of Chemistry                                               |  |
| Publisher imprint                                                                          | RSC                                                                      |  |
| Expected publication date                                                                  | Feb 2022                                                                 |  |
| <b>Requestor Location</b>                                                                  |                                                                          |  |
| Requestor Location                                                                         | Ewha Womans University<br>Ewha Womans University, Seoul, Korea           |  |
| Requestor Location                                                                         | Seoul, Seoul 03760<br>Korea, Republic Of<br>Attn: Ewha Womans University |  |
| <b>Tax Details</b>                                                                         |                                                                          |  |
| Publisher Tax ID                                                                           | EU826007151                                                              |  |
| <b>Price</b>                                                                               |                                                                          |  |
| Total                                                                                      | 0.00 USD                                                                 |  |

## Ref. 42

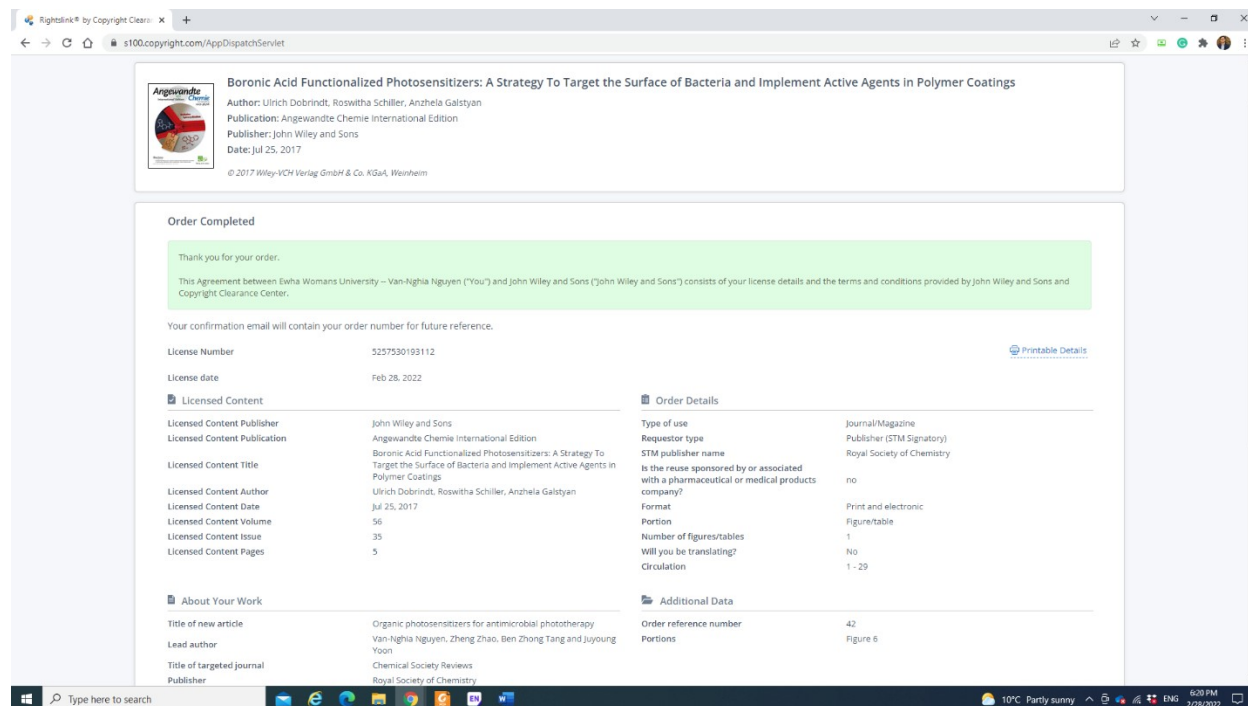

**Boronic Acid Functionalized Photosensitizers: A Strategy To Target the Surface of Bacteria and Implement Active Agents in Polymer Coatings**

Author: Ulrich Dobrindt, Roswitha Schiller, Anzhela Galstyan  
Publication: Angewandte Chemie International Edition  
Publisher: John Wiley and Sons  
Date: Jul 25, 2017  
© 2017 Wiley-VCH Verlag GmbH & Co. KGaA, Weinheim

**Order Completed**

Thank you for your order.

This Agreement between Ewha Womans University – Van-Nghia Nguyen ("You") and John Wiley and Sons ("John Wiley and Sons") consists of your license details and the terms and conditions provided by John Wiley and Sons and Copyright Clearance Center.

Your confirmation email will contain your order number for future reference.

License Number: 5257530193112 [Printable Details](#)

License date: Feb 28, 2022

| Licensed Content             |                                                                                                                                            | Order Details                                                                              |                            |
|------------------------------|--------------------------------------------------------------------------------------------------------------------------------------------|--------------------------------------------------------------------------------------------|----------------------------|
| Licensed Content Publisher   | John Wiley and Sons                                                                                                                        | Type of use                                                                                | Journal/Magazine           |
| Licensed Content Publication | Angewandte Chemie International Edition                                                                                                    | Requestor type                                                                             | Publisher (STM Signatory)  |
| Licensed Content Title       | Boronic Acid Functionalized Photosensitizers: A Strategy To Target the Surface of Bacteria and Implement Active Agents in Polymer Coatings | STM publisher name                                                                         | Royal Society of Chemistry |
| Licensed Content Author      | Ulrich Dobrindt, Roswitha Schiller, Anzhela Galstyan                                                                                       | Is the reuse sponsored by or associated with a pharmaceutical or medical products company? | no                         |
| Licensed Content Date        | Jul 25, 2017                                                                                                                               | Format                                                                                     | Print and electronic       |
| Licensed Content Volume      | 56                                                                                                                                         | Portion                                                                                    | Figure/table               |
| Licensed Content Issue       | 35                                                                                                                                         | Number of figures/tables                                                                   | 1                          |
| Licensed Content Pages       | 5                                                                                                                                          | Will you be translating?                                                                   | No                         |
|                              |                                                                                                                                            | Circulation                                                                                | 1 - 29                     |

| About Your Work           |                                                               | Additional Data        |          |
|---------------------------|---------------------------------------------------------------|------------------------|----------|
| Title of new article      | Organic photosensitizers for antimicrobial phototherapy       | Order reference number | 42       |
| Lead author               | Van-Nghia Nguyen, Zheng Zhao, Ben Zhong Tang and Juyoung Yoon | Portions               | Figure 6 |
| Title of targeted journal | Chemical Society Reviews                                      |                        |          |
| Publisher                 | Royal Society of Chemistry                                    |                        |          |

## Ref. 45

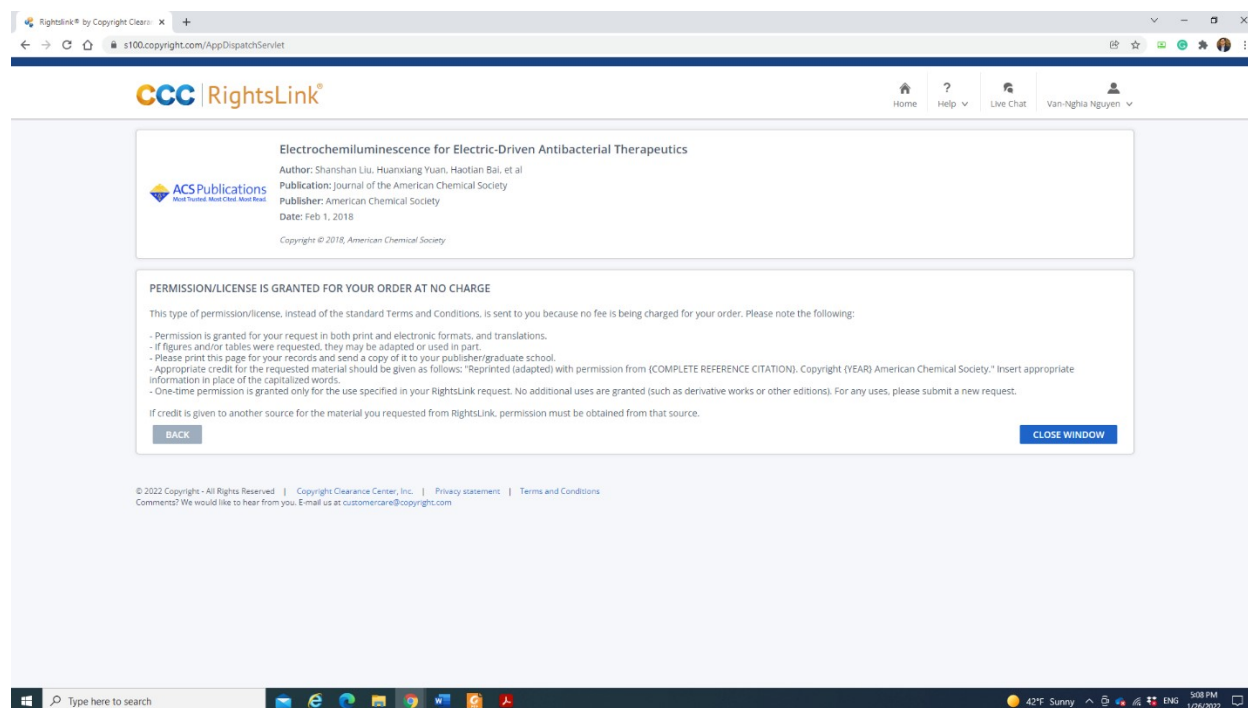

**Electrochemiluminescence for Electric-Driven Antibacterial Therapeutics**

Author: Shanshan Liu, Huanxiang Yuan, Haotian Bai, et al  
Publication: Journal of the American Chemical Society  
Publisher: American Chemical Society  
Date: Feb 1, 2018  
Copyright © 2018, American Chemical Society

**PERMISSION/LICENSE IS GRANTED FOR YOUR ORDER AT NO CHARGE**

This type of permission/license, instead of the standard Terms and Conditions, is sent to you because no fee is being charged for your order. Please note the following:

- Permission is granted for your request in both print and electronic formats, and translations.
- If figures and/or tables were requested, they may be adapted or used in part.
- Please print this page for your records and send a copy of it to your publisher/graduate school.
- Appropriate credit for the requested material should be given as follows: "Reprinted (adapted) with permission from (COMPLETE REFERENCE CITATION). Copyright (YEAR) American Chemical Society." Insert appropriate information in place of the capitalized words.
- One-time permission is granted only for the use specified in your RightsLink request. No additional uses are granted (such as derivative works or other editions). For any uses, please submit a new request.

If credit is given to another source for the material you requested from RightsLink, permission must be obtained from that source.

[BACK](#) [CLOSE WINDOW](#)

© 2022 Copyright - All Rights Reserved | Copyright Clearance Center, Inc. | Privacy statement | Terms and Conditions  
Comments? We would like to hear from you. E-mail us at [customercare@copyright.com](mailto:customercare@copyright.com)

## Ref. 47

Rightlink® by Copyright Clearance Center

100.copyright.com/AppDispatchServlet



**Multifunctional Cationic Poly(p-phenylene vinylene) Polyelectrolytes for Selective Recognition, Imaging, and Killing of Bacteria Over Mammalian Cells**  
 Author: Chunlei Zhu, Qiong Yang, Libing Liu, et al  
 Publication: Advanced Materials  
 Publisher: John Wiley and Sons  
 Date: Sep 21, 2011  
 Copyright © 2011 WILEY-VCH Verlag GmbH & Co. KGaA, Weinheim

**Order Completed**

Thank you for your order.

This Agreement between Ewha Womans University – Van-Nghia Nguyen ("You") and John Wiley and Sons ("John Wiley and Sons") consists of your license details and the terms and conditions provided by John Wiley and Sons and Copyright Clearance Center.

Your confirmation email will contain your order number for future reference.

|                |               |                                   |
|----------------|---------------|-----------------------------------|
| License Number | 5236300615974 | <a href="#">Printable Details</a> |
| License date   | Jan 26, 2022  |                                   |

|                                                                                                                                                                                                                                                                                                                                                                                                                                                                                                                                                                                                                                                                                                                                     |                                                                                                                                                       |                                                         |                              |                                                               |                           |                                                                                                                                                       |                         |                                            |                                                                                                                                    |                        |                         |          |                        |    |                        |   |                                                                                                                                                                                                                                                                                                                                                                                                                                                                                                                                                                                                                                               |             |                  |                |                           |                    |                            |                                                                                            |    |        |                      |         |              |                          |   |                          |    |             |        |
|-------------------------------------------------------------------------------------------------------------------------------------------------------------------------------------------------------------------------------------------------------------------------------------------------------------------------------------------------------------------------------------------------------------------------------------------------------------------------------------------------------------------------------------------------------------------------------------------------------------------------------------------------------------------------------------------------------------------------------------|-------------------------------------------------------------------------------------------------------------------------------------------------------|---------------------------------------------------------|------------------------------|---------------------------------------------------------------|---------------------------|-------------------------------------------------------------------------------------------------------------------------------------------------------|-------------------------|--------------------------------------------|------------------------------------------------------------------------------------------------------------------------------------|------------------------|-------------------------|----------|------------------------|----|------------------------|---|-----------------------------------------------------------------------------------------------------------------------------------------------------------------------------------------------------------------------------------------------------------------------------------------------------------------------------------------------------------------------------------------------------------------------------------------------------------------------------------------------------------------------------------------------------------------------------------------------------------------------------------------------|-------------|------------------|----------------|---------------------------|--------------------|----------------------------|--------------------------------------------------------------------------------------------|----|--------|----------------------|---------|--------------|--------------------------|---|--------------------------|----|-------------|--------|
| <b>Licensed Content</b>                                                                                                                                                                                                                                                                                                                                                                                                                                                                                                                                                                                                                                                                                                             | <b>Order Details</b>                                                                                                                                  |                                                         |                              |                                                               |                           |                                                                                                                                                       |                         |                                            |                                                                                                                                    |                        |                         |          |                        |    |                        |   |                                                                                                                                                                                                                                                                                                                                                                                                                                                                                                                                                                                                                                               |             |                  |                |                           |                    |                            |                                                                                            |    |        |                      |         |              |                          |   |                          |    |             |        |
| <table border="0"> <tr> <td>Licensed Content Publisher</td> <td>John Wiley and Sons</td> </tr> <tr> <td>Licensed Content Publication</td> <td>Advanced Materials</td> </tr> <tr> <td>Licensed Content Title</td> <td>Multifunctional Cationic Poly(p-phenylene vinylene) Polyelectrolytes for Selective Recognition, Imaging, and Killing of Bacteria Over Mammalian Cells</td> </tr> <tr> <td>Licensed Content Author</td> <td>Chunlei Zhu, Qiong Yang, Libing Liu, et al</td> </tr> <tr> <td>Licensed Content Date</td> <td>Sep 21, 2011</td> </tr> <tr> <td>Licensed Content Volume</td> <td>23</td> </tr> <tr> <td>Licensed Content Issue</td> <td>41</td> </tr> <tr> <td>Licensed Content Pages</td> <td>5</td> </tr> </table> | Licensed Content Publisher                                                                                                                            | John Wiley and Sons                                     | Licensed Content Publication | Advanced Materials                                            | Licensed Content Title    | Multifunctional Cationic Poly(p-phenylene vinylene) Polyelectrolytes for Selective Recognition, Imaging, and Killing of Bacteria Over Mammalian Cells | Licensed Content Author | Chunlei Zhu, Qiong Yang, Libing Liu, et al | Licensed Content Date                                                                                                              | Sep 21, 2011           | Licensed Content Volume | 23       | Licensed Content Issue | 41 | Licensed Content Pages | 5 | <table border="0"> <tr> <td>Type of use</td> <td>Journal/Magazine</td> </tr> <tr> <td>Requestor type</td> <td>Publisher (STM Signatory)</td> </tr> <tr> <td>STM publisher name</td> <td>Royal Society of Chemistry</td> </tr> <tr> <td>Is the reuse sponsored by or associated with a pharmaceutical or medical products company?</td> <td>no</td> </tr> <tr> <td>Format</td> <td>Print and electronic</td> </tr> <tr> <td>Portion</td> <td>Figure/table</td> </tr> <tr> <td>Number of figures/tables</td> <td>1</td> </tr> <tr> <td>Will you be translating?</td> <td>No</td> </tr> <tr> <td>Circulation</td> <td>1 - 29</td> </tr> </table> | Type of use | Journal/Magazine | Requestor type | Publisher (STM Signatory) | STM publisher name | Royal Society of Chemistry | Is the reuse sponsored by or associated with a pharmaceutical or medical products company? | no | Format | Print and electronic | Portion | Figure/table | Number of figures/tables | 1 | Will you be translating? | No | Circulation | 1 - 29 |
| Licensed Content Publisher                                                                                                                                                                                                                                                                                                                                                                                                                                                                                                                                                                                                                                                                                                          | John Wiley and Sons                                                                                                                                   |                                                         |                              |                                                               |                           |                                                                                                                                                       |                         |                                            |                                                                                                                                    |                        |                         |          |                        |    |                        |   |                                                                                                                                                                                                                                                                                                                                                                                                                                                                                                                                                                                                                                               |             |                  |                |                           |                    |                            |                                                                                            |    |        |                      |         |              |                          |   |                          |    |             |        |
| Licensed Content Publication                                                                                                                                                                                                                                                                                                                                                                                                                                                                                                                                                                                                                                                                                                        | Advanced Materials                                                                                                                                    |                                                         |                              |                                                               |                           |                                                                                                                                                       |                         |                                            |                                                                                                                                    |                        |                         |          |                        |    |                        |   |                                                                                                                                                                                                                                                                                                                                                                                                                                                                                                                                                                                                                                               |             |                  |                |                           |                    |                            |                                                                                            |    |        |                      |         |              |                          |   |                          |    |             |        |
| Licensed Content Title                                                                                                                                                                                                                                                                                                                                                                                                                                                                                                                                                                                                                                                                                                              | Multifunctional Cationic Poly(p-phenylene vinylene) Polyelectrolytes for Selective Recognition, Imaging, and Killing of Bacteria Over Mammalian Cells |                                                         |                              |                                                               |                           |                                                                                                                                                       |                         |                                            |                                                                                                                                    |                        |                         |          |                        |    |                        |   |                                                                                                                                                                                                                                                                                                                                                                                                                                                                                                                                                                                                                                               |             |                  |                |                           |                    |                            |                                                                                            |    |        |                      |         |              |                          |   |                          |    |             |        |
| Licensed Content Author                                                                                                                                                                                                                                                                                                                                                                                                                                                                                                                                                                                                                                                                                                             | Chunlei Zhu, Qiong Yang, Libing Liu, et al                                                                                                            |                                                         |                              |                                                               |                           |                                                                                                                                                       |                         |                                            |                                                                                                                                    |                        |                         |          |                        |    |                        |   |                                                                                                                                                                                                                                                                                                                                                                                                                                                                                                                                                                                                                                               |             |                  |                |                           |                    |                            |                                                                                            |    |        |                      |         |              |                          |   |                          |    |             |        |
| Licensed Content Date                                                                                                                                                                                                                                                                                                                                                                                                                                                                                                                                                                                                                                                                                                               | Sep 21, 2011                                                                                                                                          |                                                         |                              |                                                               |                           |                                                                                                                                                       |                         |                                            |                                                                                                                                    |                        |                         |          |                        |    |                        |   |                                                                                                                                                                                                                                                                                                                                                                                                                                                                                                                                                                                                                                               |             |                  |                |                           |                    |                            |                                                                                            |    |        |                      |         |              |                          |   |                          |    |             |        |
| Licensed Content Volume                                                                                                                                                                                                                                                                                                                                                                                                                                                                                                                                                                                                                                                                                                             | 23                                                                                                                                                    |                                                         |                              |                                                               |                           |                                                                                                                                                       |                         |                                            |                                                                                                                                    |                        |                         |          |                        |    |                        |   |                                                                                                                                                                                                                                                                                                                                                                                                                                                                                                                                                                                                                                               |             |                  |                |                           |                    |                            |                                                                                            |    |        |                      |         |              |                          |   |                          |    |             |        |
| Licensed Content Issue                                                                                                                                                                                                                                                                                                                                                                                                                                                                                                                                                                                                                                                                                                              | 41                                                                                                                                                    |                                                         |                              |                                                               |                           |                                                                                                                                                       |                         |                                            |                                                                                                                                    |                        |                         |          |                        |    |                        |   |                                                                                                                                                                                                                                                                                                                                                                                                                                                                                                                                                                                                                                               |             |                  |                |                           |                    |                            |                                                                                            |    |        |                      |         |              |                          |   |                          |    |             |        |
| Licensed Content Pages                                                                                                                                                                                                                                                                                                                                                                                                                                                                                                                                                                                                                                                                                                              | 5                                                                                                                                                     |                                                         |                              |                                                               |                           |                                                                                                                                                       |                         |                                            |                                                                                                                                    |                        |                         |          |                        |    |                        |   |                                                                                                                                                                                                                                                                                                                                                                                                                                                                                                                                                                                                                                               |             |                  |                |                           |                    |                            |                                                                                            |    |        |                      |         |              |                          |   |                          |    |             |        |
| Type of use                                                                                                                                                                                                                                                                                                                                                                                                                                                                                                                                                                                                                                                                                                                         | Journal/Magazine                                                                                                                                      |                                                         |                              |                                                               |                           |                                                                                                                                                       |                         |                                            |                                                                                                                                    |                        |                         |          |                        |    |                        |   |                                                                                                                                                                                                                                                                                                                                                                                                                                                                                                                                                                                                                                               |             |                  |                |                           |                    |                            |                                                                                            |    |        |                      |         |              |                          |   |                          |    |             |        |
| Requestor type                                                                                                                                                                                                                                                                                                                                                                                                                                                                                                                                                                                                                                                                                                                      | Publisher (STM Signatory)                                                                                                                             |                                                         |                              |                                                               |                           |                                                                                                                                                       |                         |                                            |                                                                                                                                    |                        |                         |          |                        |    |                        |   |                                                                                                                                                                                                                                                                                                                                                                                                                                                                                                                                                                                                                                               |             |                  |                |                           |                    |                            |                                                                                            |    |        |                      |         |              |                          |   |                          |    |             |        |
| STM publisher name                                                                                                                                                                                                                                                                                                                                                                                                                                                                                                                                                                                                                                                                                                                  | Royal Society of Chemistry                                                                                                                            |                                                         |                              |                                                               |                           |                                                                                                                                                       |                         |                                            |                                                                                                                                    |                        |                         |          |                        |    |                        |   |                                                                                                                                                                                                                                                                                                                                                                                                                                                                                                                                                                                                                                               |             |                  |                |                           |                    |                            |                                                                                            |    |        |                      |         |              |                          |   |                          |    |             |        |
| Is the reuse sponsored by or associated with a pharmaceutical or medical products company?                                                                                                                                                                                                                                                                                                                                                                                                                                                                                                                                                                                                                                          | no                                                                                                                                                    |                                                         |                              |                                                               |                           |                                                                                                                                                       |                         |                                            |                                                                                                                                    |                        |                         |          |                        |    |                        |   |                                                                                                                                                                                                                                                                                                                                                                                                                                                                                                                                                                                                                                               |             |                  |                |                           |                    |                            |                                                                                            |    |        |                      |         |              |                          |   |                          |    |             |        |
| Format                                                                                                                                                                                                                                                                                                                                                                                                                                                                                                                                                                                                                                                                                                                              | Print and electronic                                                                                                                                  |                                                         |                              |                                                               |                           |                                                                                                                                                       |                         |                                            |                                                                                                                                    |                        |                         |          |                        |    |                        |   |                                                                                                                                                                                                                                                                                                                                                                                                                                                                                                                                                                                                                                               |             |                  |                |                           |                    |                            |                                                                                            |    |        |                      |         |              |                          |   |                          |    |             |        |
| Portion                                                                                                                                                                                                                                                                                                                                                                                                                                                                                                                                                                                                                                                                                                                             | Figure/table                                                                                                                                          |                                                         |                              |                                                               |                           |                                                                                                                                                       |                         |                                            |                                                                                                                                    |                        |                         |          |                        |    |                        |   |                                                                                                                                                                                                                                                                                                                                                                                                                                                                                                                                                                                                                                               |             |                  |                |                           |                    |                            |                                                                                            |    |        |                      |         |              |                          |   |                          |    |             |        |
| Number of figures/tables                                                                                                                                                                                                                                                                                                                                                                                                                                                                                                                                                                                                                                                                                                            | 1                                                                                                                                                     |                                                         |                              |                                                               |                           |                                                                                                                                                       |                         |                                            |                                                                                                                                    |                        |                         |          |                        |    |                        |   |                                                                                                                                                                                                                                                                                                                                                                                                                                                                                                                                                                                                                                               |             |                  |                |                           |                    |                            |                                                                                            |    |        |                      |         |              |                          |   |                          |    |             |        |
| Will you be translating?                                                                                                                                                                                                                                                                                                                                                                                                                                                                                                                                                                                                                                                                                                            | No                                                                                                                                                    |                                                         |                              |                                                               |                           |                                                                                                                                                       |                         |                                            |                                                                                                                                    |                        |                         |          |                        |    |                        |   |                                                                                                                                                                                                                                                                                                                                                                                                                                                                                                                                                                                                                                               |             |                  |                |                           |                    |                            |                                                                                            |    |        |                      |         |              |                          |   |                          |    |             |        |
| Circulation                                                                                                                                                                                                                                                                                                                                                                                                                                                                                                                                                                                                                                                                                                                         | 1 - 29                                                                                                                                                |                                                         |                              |                                                               |                           |                                                                                                                                                       |                         |                                            |                                                                                                                                    |                        |                         |          |                        |    |                        |   |                                                                                                                                                                                                                                                                                                                                                                                                                                                                                                                                                                                                                                               |             |                  |                |                           |                    |                            |                                                                                            |    |        |                      |         |              |                          |   |                          |    |             |        |
| <b>About Your Work</b>                                                                                                                                                                                                                                                                                                                                                                                                                                                                                                                                                                                                                                                                                                              | <b>Additional Data</b>                                                                                                                                |                                                         |                              |                                                               |                           |                                                                                                                                                       |                         |                                            |                                                                                                                                    |                        |                         |          |                        |    |                        |   |                                                                                                                                                                                                                                                                                                                                                                                                                                                                                                                                                                                                                                               |             |                  |                |                           |                    |                            |                                                                                            |    |        |                      |         |              |                          |   |                          |    |             |        |
| <table border="0"> <tr> <td>Title of new article</td> <td>Organic photosensitizers for antimicrobial phototherapy</td> </tr> <tr> <td>Lead author</td> <td>Van-Nghia Nguyen, Zheng Zhao, Ben Zhong Tang and Juyoung Yoon</td> </tr> <tr> <td>Title of targeted journal</td> <td>Chemical Society Reviews</td> </tr> <tr> <td>Publisher</td> <td>Royal Society of Chemistry</td> </tr> </table>                                                                                                                                                                                                                                                                                                                                      | Title of new article                                                                                                                                  | Organic photosensitizers for antimicrobial phototherapy | Lead author                  | Van-Nghia Nguyen, Zheng Zhao, Ben Zhong Tang and Juyoung Yoon | Title of targeted journal | Chemical Society Reviews                                                                                                                              | Publisher               | Royal Society of Chemistry                 | <table border="0"> <tr> <td>Order reference number</td> <td>46</td> </tr> <tr> <td>Portions</td> <td>Figure 9a</td> </tr> </table> | Order reference number | 46                      | Portions | Figure 9a              |    |                        |   |                                                                                                                                                                                                                                                                                                                                                                                                                                                                                                                                                                                                                                               |             |                  |                |                           |                    |                            |                                                                                            |    |        |                      |         |              |                          |   |                          |    |             |        |
| Title of new article                                                                                                                                                                                                                                                                                                                                                                                                                                                                                                                                                                                                                                                                                                                | Organic photosensitizers for antimicrobial phototherapy                                                                                               |                                                         |                              |                                                               |                           |                                                                                                                                                       |                         |                                            |                                                                                                                                    |                        |                         |          |                        |    |                        |   |                                                                                                                                                                                                                                                                                                                                                                                                                                                                                                                                                                                                                                               |             |                  |                |                           |                    |                            |                                                                                            |    |        |                      |         |              |                          |   |                          |    |             |        |
| Lead author                                                                                                                                                                                                                                                                                                                                                                                                                                                                                                                                                                                                                                                                                                                         | Van-Nghia Nguyen, Zheng Zhao, Ben Zhong Tang and Juyoung Yoon                                                                                         |                                                         |                              |                                                               |                           |                                                                                                                                                       |                         |                                            |                                                                                                                                    |                        |                         |          |                        |    |                        |   |                                                                                                                                                                                                                                                                                                                                                                                                                                                                                                                                                                                                                                               |             |                  |                |                           |                    |                            |                                                                                            |    |        |                      |         |              |                          |   |                          |    |             |        |
| Title of targeted journal                                                                                                                                                                                                                                                                                                                                                                                                                                                                                                                                                                                                                                                                                                           | Chemical Society Reviews                                                                                                                              |                                                         |                              |                                                               |                           |                                                                                                                                                       |                         |                                            |                                                                                                                                    |                        |                         |          |                        |    |                        |   |                                                                                                                                                                                                                                                                                                                                                                                                                                                                                                                                                                                                                                               |             |                  |                |                           |                    |                            |                                                                                            |    |        |                      |         |              |                          |   |                          |    |             |        |
| Publisher                                                                                                                                                                                                                                                                                                                                                                                                                                                                                                                                                                                                                                                                                                                           | Royal Society of Chemistry                                                                                                                            |                                                         |                              |                                                               |                           |                                                                                                                                                       |                         |                                            |                                                                                                                                    |                        |                         |          |                        |    |                        |   |                                                                                                                                                                                                                                                                                                                                                                                                                                                                                                                                                                                                                                               |             |                  |                |                           |                    |                            |                                                                                            |    |        |                      |         |              |                          |   |                          |    |             |        |
| Order reference number                                                                                                                                                                                                                                                                                                                                                                                                                                                                                                                                                                                                                                                                                                              | 46                                                                                                                                                    |                                                         |                              |                                                               |                           |                                                                                                                                                       |                         |                                            |                                                                                                                                    |                        |                         |          |                        |    |                        |   |                                                                                                                                                                                                                                                                                                                                                                                                                                                                                                                                                                                                                                               |             |                  |                |                           |                    |                            |                                                                                            |    |        |                      |         |              |                          |   |                          |    |             |        |
| Portions                                                                                                                                                                                                                                                                                                                                                                                                                                                                                                                                                                                                                                                                                                                            | Figure 9a                                                                                                                                             |                                                         |                              |                                                               |                           |                                                                                                                                                       |                         |                                            |                                                                                                                                    |                        |                         |          |                        |    |                        |   |                                                                                                                                                                                                                                                                                                                                                                                                                                                                                                                                                                                                                                               |             |                  |                |                           |                    |                            |                                                                                            |    |        |                      |         |              |                          |   |                          |    |             |        |

## Ref. 48

Rightlink® by Copyright Clearance Center

100.copyright.com/AppDispatchServlet



**An AIE-Active Conjugated Polymer with High ROS-Generation Ability and Biocompatibility for Efficient Photodynamic Therapy of Bacterial Infections**  
 Author: Ben Zhong Tang, Anjun Qin, Chunlei Zhan, et al  
 Publication: Angewandte Chemie International Edition  
 Publisher: John Wiley and Sons  
 Date: Mar 11, 2020  
 © 2020 Wiley-VCH Verlag GmbH & Co. KGaA, Weinheim

**Order Completed**

Thank you for your order.

This Agreement between Ewha Womans University – Van-Nghia Nguyen ("You") and John Wiley and Sons ("John Wiley and Sons") consists of your license details and the terms and conditions provided by John Wiley and Sons and Copyright Clearance Center.

Your confirmation email will contain your order number for future reference.

|                |               |                                   |
|----------------|---------------|-----------------------------------|
| License Number | 5236300898933 | <a href="#">Printable Details</a> |
| License date   | Jan 26, 2022  |                                   |

|                                                                                                                                                                                                                                                                                                                                                                                                                                                                                                                                                                                                                                                                                                                                                          |                                                                                                                                                   |                                                         |                              |                                                               |                           |                                                                                                                                                   |                         |                                                |                                                                                                                                    |                        |                         |          |                        |    |                        |   |                                                                                                                                                                                                                                                                                                                                                                                                                                                                                                                                                                                                                                               |             |                  |                |                           |                    |                            |                                                                                            |    |        |                      |         |              |                          |   |                          |    |             |        |
|----------------------------------------------------------------------------------------------------------------------------------------------------------------------------------------------------------------------------------------------------------------------------------------------------------------------------------------------------------------------------------------------------------------------------------------------------------------------------------------------------------------------------------------------------------------------------------------------------------------------------------------------------------------------------------------------------------------------------------------------------------|---------------------------------------------------------------------------------------------------------------------------------------------------|---------------------------------------------------------|------------------------------|---------------------------------------------------------------|---------------------------|---------------------------------------------------------------------------------------------------------------------------------------------------|-------------------------|------------------------------------------------|------------------------------------------------------------------------------------------------------------------------------------|------------------------|-------------------------|----------|------------------------|----|------------------------|---|-----------------------------------------------------------------------------------------------------------------------------------------------------------------------------------------------------------------------------------------------------------------------------------------------------------------------------------------------------------------------------------------------------------------------------------------------------------------------------------------------------------------------------------------------------------------------------------------------------------------------------------------------|-------------|------------------|----------------|---------------------------|--------------------|----------------------------|--------------------------------------------------------------------------------------------|----|--------|----------------------|---------|--------------|--------------------------|---|--------------------------|----|-------------|--------|
| <b>Licensed Content</b>                                                                                                                                                                                                                                                                                                                                                                                                                                                                                                                                                                                                                                                                                                                                  | <b>Order Details</b>                                                                                                                              |                                                         |                              |                                                               |                           |                                                                                                                                                   |                         |                                                |                                                                                                                                    |                        |                         |          |                        |    |                        |   |                                                                                                                                                                                                                                                                                                                                                                                                                                                                                                                                                                                                                                               |             |                  |                |                           |                    |                            |                                                                                            |    |        |                      |         |              |                          |   |                          |    |             |        |
| <table border="0"> <tr> <td>Licensed Content Publisher</td> <td>John Wiley and Sons</td> </tr> <tr> <td>Licensed Content Publication</td> <td>Angewandte Chemie International Edition</td> </tr> <tr> <td>Licensed Content Title</td> <td>An AIE-Active Conjugated Polymer with High ROS-Generation Ability and Biocompatibility for Efficient Photodynamic Therapy of Bacterial Infections</td> </tr> <tr> <td>Licensed Content Author</td> <td>Ben Zhong Tang, Anjun Qin, Chunlei Zhan, et al</td> </tr> <tr> <td>Licensed Content Date</td> <td>Mar 11, 2020</td> </tr> <tr> <td>Licensed Content Volume</td> <td>59</td> </tr> <tr> <td>Licensed Content Issue</td> <td>25</td> </tr> <tr> <td>Licensed Content Pages</td> <td>5</td> </tr> </table> | Licensed Content Publisher                                                                                                                        | John Wiley and Sons                                     | Licensed Content Publication | Angewandte Chemie International Edition                       | Licensed Content Title    | An AIE-Active Conjugated Polymer with High ROS-Generation Ability and Biocompatibility for Efficient Photodynamic Therapy of Bacterial Infections | Licensed Content Author | Ben Zhong Tang, Anjun Qin, Chunlei Zhan, et al | Licensed Content Date                                                                                                              | Mar 11, 2020           | Licensed Content Volume | 59       | Licensed Content Issue | 25 | Licensed Content Pages | 5 | <table border="0"> <tr> <td>Type of use</td> <td>Journal/Magazine</td> </tr> <tr> <td>Requestor type</td> <td>Publisher (STM Signatory)</td> </tr> <tr> <td>STM publisher name</td> <td>Royal Society of Chemistry</td> </tr> <tr> <td>Is the reuse sponsored by or associated with a pharmaceutical or medical products company?</td> <td>no</td> </tr> <tr> <td>Format</td> <td>Print and electronic</td> </tr> <tr> <td>Portion</td> <td>Figure/table</td> </tr> <tr> <td>Number of figures/tables</td> <td>1</td> </tr> <tr> <td>Will you be translating?</td> <td>No</td> </tr> <tr> <td>Circulation</td> <td>1 - 29</td> </tr> </table> | Type of use | Journal/Magazine | Requestor type | Publisher (STM Signatory) | STM publisher name | Royal Society of Chemistry | Is the reuse sponsored by or associated with a pharmaceutical or medical products company? | no | Format | Print and electronic | Portion | Figure/table | Number of figures/tables | 1 | Will you be translating? | No | Circulation | 1 - 29 |
| Licensed Content Publisher                                                                                                                                                                                                                                                                                                                                                                                                                                                                                                                                                                                                                                                                                                                               | John Wiley and Sons                                                                                                                               |                                                         |                              |                                                               |                           |                                                                                                                                                   |                         |                                                |                                                                                                                                    |                        |                         |          |                        |    |                        |   |                                                                                                                                                                                                                                                                                                                                                                                                                                                                                                                                                                                                                                               |             |                  |                |                           |                    |                            |                                                                                            |    |        |                      |         |              |                          |   |                          |    |             |        |
| Licensed Content Publication                                                                                                                                                                                                                                                                                                                                                                                                                                                                                                                                                                                                                                                                                                                             | Angewandte Chemie International Edition                                                                                                           |                                                         |                              |                                                               |                           |                                                                                                                                                   |                         |                                                |                                                                                                                                    |                        |                         |          |                        |    |                        |   |                                                                                                                                                                                                                                                                                                                                                                                                                                                                                                                                                                                                                                               |             |                  |                |                           |                    |                            |                                                                                            |    |        |                      |         |              |                          |   |                          |    |             |        |
| Licensed Content Title                                                                                                                                                                                                                                                                                                                                                                                                                                                                                                                                                                                                                                                                                                                                   | An AIE-Active Conjugated Polymer with High ROS-Generation Ability and Biocompatibility for Efficient Photodynamic Therapy of Bacterial Infections |                                                         |                              |                                                               |                           |                                                                                                                                                   |                         |                                                |                                                                                                                                    |                        |                         |          |                        |    |                        |   |                                                                                                                                                                                                                                                                                                                                                                                                                                                                                                                                                                                                                                               |             |                  |                |                           |                    |                            |                                                                                            |    |        |                      |         |              |                          |   |                          |    |             |        |
| Licensed Content Author                                                                                                                                                                                                                                                                                                                                                                                                                                                                                                                                                                                                                                                                                                                                  | Ben Zhong Tang, Anjun Qin, Chunlei Zhan, et al                                                                                                    |                                                         |                              |                                                               |                           |                                                                                                                                                   |                         |                                                |                                                                                                                                    |                        |                         |          |                        |    |                        |   |                                                                                                                                                                                                                                                                                                                                                                                                                                                                                                                                                                                                                                               |             |                  |                |                           |                    |                            |                                                                                            |    |        |                      |         |              |                          |   |                          |    |             |        |
| Licensed Content Date                                                                                                                                                                                                                                                                                                                                                                                                                                                                                                                                                                                                                                                                                                                                    | Mar 11, 2020                                                                                                                                      |                                                         |                              |                                                               |                           |                                                                                                                                                   |                         |                                                |                                                                                                                                    |                        |                         |          |                        |    |                        |   |                                                                                                                                                                                                                                                                                                                                                                                                                                                                                                                                                                                                                                               |             |                  |                |                           |                    |                            |                                                                                            |    |        |                      |         |              |                          |   |                          |    |             |        |
| Licensed Content Volume                                                                                                                                                                                                                                                                                                                                                                                                                                                                                                                                                                                                                                                                                                                                  | 59                                                                                                                                                |                                                         |                              |                                                               |                           |                                                                                                                                                   |                         |                                                |                                                                                                                                    |                        |                         |          |                        |    |                        |   |                                                                                                                                                                                                                                                                                                                                                                                                                                                                                                                                                                                                                                               |             |                  |                |                           |                    |                            |                                                                                            |    |        |                      |         |              |                          |   |                          |    |             |        |
| Licensed Content Issue                                                                                                                                                                                                                                                                                                                                                                                                                                                                                                                                                                                                                                                                                                                                   | 25                                                                                                                                                |                                                         |                              |                                                               |                           |                                                                                                                                                   |                         |                                                |                                                                                                                                    |                        |                         |          |                        |    |                        |   |                                                                                                                                                                                                                                                                                                                                                                                                                                                                                                                                                                                                                                               |             |                  |                |                           |                    |                            |                                                                                            |    |        |                      |         |              |                          |   |                          |    |             |        |
| Licensed Content Pages                                                                                                                                                                                                                                                                                                                                                                                                                                                                                                                                                                                                                                                                                                                                   | 5                                                                                                                                                 |                                                         |                              |                                                               |                           |                                                                                                                                                   |                         |                                                |                                                                                                                                    |                        |                         |          |                        |    |                        |   |                                                                                                                                                                                                                                                                                                                                                                                                                                                                                                                                                                                                                                               |             |                  |                |                           |                    |                            |                                                                                            |    |        |                      |         |              |                          |   |                          |    |             |        |
| Type of use                                                                                                                                                                                                                                                                                                                                                                                                                                                                                                                                                                                                                                                                                                                                              | Journal/Magazine                                                                                                                                  |                                                         |                              |                                                               |                           |                                                                                                                                                   |                         |                                                |                                                                                                                                    |                        |                         |          |                        |    |                        |   |                                                                                                                                                                                                                                                                                                                                                                                                                                                                                                                                                                                                                                               |             |                  |                |                           |                    |                            |                                                                                            |    |        |                      |         |              |                          |   |                          |    |             |        |
| Requestor type                                                                                                                                                                                                                                                                                                                                                                                                                                                                                                                                                                                                                                                                                                                                           | Publisher (STM Signatory)                                                                                                                         |                                                         |                              |                                                               |                           |                                                                                                                                                   |                         |                                                |                                                                                                                                    |                        |                         |          |                        |    |                        |   |                                                                                                                                                                                                                                                                                                                                                                                                                                                                                                                                                                                                                                               |             |                  |                |                           |                    |                            |                                                                                            |    |        |                      |         |              |                          |   |                          |    |             |        |
| STM publisher name                                                                                                                                                                                                                                                                                                                                                                                                                                                                                                                                                                                                                                                                                                                                       | Royal Society of Chemistry                                                                                                                        |                                                         |                              |                                                               |                           |                                                                                                                                                   |                         |                                                |                                                                                                                                    |                        |                         |          |                        |    |                        |   |                                                                                                                                                                                                                                                                                                                                                                                                                                                                                                                                                                                                                                               |             |                  |                |                           |                    |                            |                                                                                            |    |        |                      |         |              |                          |   |                          |    |             |        |
| Is the reuse sponsored by or associated with a pharmaceutical or medical products company?                                                                                                                                                                                                                                                                                                                                                                                                                                                                                                                                                                                                                                                               | no                                                                                                                                                |                                                         |                              |                                                               |                           |                                                                                                                                                   |                         |                                                |                                                                                                                                    |                        |                         |          |                        |    |                        |   |                                                                                                                                                                                                                                                                                                                                                                                                                                                                                                                                                                                                                                               |             |                  |                |                           |                    |                            |                                                                                            |    |        |                      |         |              |                          |   |                          |    |             |        |
| Format                                                                                                                                                                                                                                                                                                                                                                                                                                                                                                                                                                                                                                                                                                                                                   | Print and electronic                                                                                                                              |                                                         |                              |                                                               |                           |                                                                                                                                                   |                         |                                                |                                                                                                                                    |                        |                         |          |                        |    |                        |   |                                                                                                                                                                                                                                                                                                                                                                                                                                                                                                                                                                                                                                               |             |                  |                |                           |                    |                            |                                                                                            |    |        |                      |         |              |                          |   |                          |    |             |        |
| Portion                                                                                                                                                                                                                                                                                                                                                                                                                                                                                                                                                                                                                                                                                                                                                  | Figure/table                                                                                                                                      |                                                         |                              |                                                               |                           |                                                                                                                                                   |                         |                                                |                                                                                                                                    |                        |                         |          |                        |    |                        |   |                                                                                                                                                                                                                                                                                                                                                                                                                                                                                                                                                                                                                                               |             |                  |                |                           |                    |                            |                                                                                            |    |        |                      |         |              |                          |   |                          |    |             |        |
| Number of figures/tables                                                                                                                                                                                                                                                                                                                                                                                                                                                                                                                                                                                                                                                                                                                                 | 1                                                                                                                                                 |                                                         |                              |                                                               |                           |                                                                                                                                                   |                         |                                                |                                                                                                                                    |                        |                         |          |                        |    |                        |   |                                                                                                                                                                                                                                                                                                                                                                                                                                                                                                                                                                                                                                               |             |                  |                |                           |                    |                            |                                                                                            |    |        |                      |         |              |                          |   |                          |    |             |        |
| Will you be translating?                                                                                                                                                                                                                                                                                                                                                                                                                                                                                                                                                                                                                                                                                                                                 | No                                                                                                                                                |                                                         |                              |                                                               |                           |                                                                                                                                                   |                         |                                                |                                                                                                                                    |                        |                         |          |                        |    |                        |   |                                                                                                                                                                                                                                                                                                                                                                                                                                                                                                                                                                                                                                               |             |                  |                |                           |                    |                            |                                                                                            |    |        |                      |         |              |                          |   |                          |    |             |        |
| Circulation                                                                                                                                                                                                                                                                                                                                                                                                                                                                                                                                                                                                                                                                                                                                              | 1 - 29                                                                                                                                            |                                                         |                              |                                                               |                           |                                                                                                                                                   |                         |                                                |                                                                                                                                    |                        |                         |          |                        |    |                        |   |                                                                                                                                                                                                                                                                                                                                                                                                                                                                                                                                                                                                                                               |             |                  |                |                           |                    |                            |                                                                                            |    |        |                      |         |              |                          |   |                          |    |             |        |
| <b>About Your Work</b>                                                                                                                                                                                                                                                                                                                                                                                                                                                                                                                                                                                                                                                                                                                                   | <b>Additional Data</b>                                                                                                                            |                                                         |                              |                                                               |                           |                                                                                                                                                   |                         |                                                |                                                                                                                                    |                        |                         |          |                        |    |                        |   |                                                                                                                                                                                                                                                                                                                                                                                                                                                                                                                                                                                                                                               |             |                  |                |                           |                    |                            |                                                                                            |    |        |                      |         |              |                          |   |                          |    |             |        |
| <table border="0"> <tr> <td>Title of new article</td> <td>Organic photosensitizers for antimicrobial phototherapy</td> </tr> <tr> <td>Lead author</td> <td>Van-Nghia Nguyen, Zheng Zhao, Ben Zhong Tang and Juyoung Yoon</td> </tr> <tr> <td>Title of targeted journal</td> <td>Chemical Society Reviews</td> </tr> <tr> <td>Publisher</td> <td>Royal Society of Chemistry</td> </tr> </table>                                                                                                                                                                                                                                                                                                                                                           | Title of new article                                                                                                                              | Organic photosensitizers for antimicrobial phototherapy | Lead author                  | Van-Nghia Nguyen, Zheng Zhao, Ben Zhong Tang and Juyoung Yoon | Title of targeted journal | Chemical Society Reviews                                                                                                                          | Publisher               | Royal Society of Chemistry                     | <table border="0"> <tr> <td>Order reference number</td> <td>47</td> </tr> <tr> <td>Portions</td> <td>Figure 9b</td> </tr> </table> | Order reference number | 47                      | Portions | Figure 9b              |    |                        |   |                                                                                                                                                                                                                                                                                                                                                                                                                                                                                                                                                                                                                                               |             |                  |                |                           |                    |                            |                                                                                            |    |        |                      |         |              |                          |   |                          |    |             |        |
| Title of new article                                                                                                                                                                                                                                                                                                                                                                                                                                                                                                                                                                                                                                                                                                                                     | Organic photosensitizers for antimicrobial phototherapy                                                                                           |                                                         |                              |                                                               |                           |                                                                                                                                                   |                         |                                                |                                                                                                                                    |                        |                         |          |                        |    |                        |   |                                                                                                                                                                                                                                                                                                                                                                                                                                                                                                                                                                                                                                               |             |                  |                |                           |                    |                            |                                                                                            |    |        |                      |         |              |                          |   |                          |    |             |        |
| Lead author                                                                                                                                                                                                                                                                                                                                                                                                                                                                                                                                                                                                                                                                                                                                              | Van-Nghia Nguyen, Zheng Zhao, Ben Zhong Tang and Juyoung Yoon                                                                                     |                                                         |                              |                                                               |                           |                                                                                                                                                   |                         |                                                |                                                                                                                                    |                        |                         |          |                        |    |                        |   |                                                                                                                                                                                                                                                                                                                                                                                                                                                                                                                                                                                                                                               |             |                  |                |                           |                    |                            |                                                                                            |    |        |                      |         |              |                          |   |                          |    |             |        |
| Title of targeted journal                                                                                                                                                                                                                                                                                                                                                                                                                                                                                                                                                                                                                                                                                                                                | Chemical Society Reviews                                                                                                                          |                                                         |                              |                                                               |                           |                                                                                                                                                   |                         |                                                |                                                                                                                                    |                        |                         |          |                        |    |                        |   |                                                                                                                                                                                                                                                                                                                                                                                                                                                                                                                                                                                                                                               |             |                  |                |                           |                    |                            |                                                                                            |    |        |                      |         |              |                          |   |                          |    |             |        |
| Publisher                                                                                                                                                                                                                                                                                                                                                                                                                                                                                                                                                                                                                                                                                                                                                | Royal Society of Chemistry                                                                                                                        |                                                         |                              |                                                               |                           |                                                                                                                                                   |                         |                                                |                                                                                                                                    |                        |                         |          |                        |    |                        |   |                                                                                                                                                                                                                                                                                                                                                                                                                                                                                                                                                                                                                                               |             |                  |                |                           |                    |                            |                                                                                            |    |        |                      |         |              |                          |   |                          |    |             |        |
| Order reference number                                                                                                                                                                                                                                                                                                                                                                                                                                                                                                                                                                                                                                                                                                                                   | 47                                                                                                                                                |                                                         |                              |                                                               |                           |                                                                                                                                                   |                         |                                                |                                                                                                                                    |                        |                         |          |                        |    |                        |   |                                                                                                                                                                                                                                                                                                                                                                                                                                                                                                                                                                                                                                               |             |                  |                |                           |                    |                            |                                                                                            |    |        |                      |         |              |                          |   |                          |    |             |        |
| Portions                                                                                                                                                                                                                                                                                                                                                                                                                                                                                                                                                                                                                                                                                                                                                 | Figure 9b                                                                                                                                         |                                                         |                              |                                                               |                           |                                                                                                                                                   |                         |                                                |                                                                                                                                    |                        |                         |          |                        |    |                        |   |                                                                                                                                                                                                                                                                                                                                                                                                                                                                                                                                                                                                                                               |             |                  |                |                           |                    |                            |                                                                                            |    |        |                      |         |              |                          |   |                          |    |             |        |

## Ref. 49

The screenshot shows a web browser window with the URL `s100.copyright.com/AppDispatchServlet#formTop`. The page header features the **CCC RightsLink** logo and navigation links for Home, Help, Live Chat, and a user profile for Van-Nghia Nguyen. The main content area displays the following information:

**ONOO- and CIO- Responsive Organic Nanoparticles for Specific in Vivo Image-Guided Photodynamic Bacterial Ablation**  
Author: Wenbo Wu, Duo Mao, Xiaolei Cai, et al  
Publication: Chemistry of Materials  
Publisher: American Chemical Society  
Date: Jun 1, 2018  
Copyright © 2018, American Chemical Society

**PERMISSION/LICENSE IS GRANTED FOR YOUR ORDER AT NO CHARGE**

This type of permission/license, instead of the standard Terms and Conditions, is sent to you because no fee is being charged for your order. Please note the following:

- Permission is granted for your request in both print and electronic formats, and translations.
- If figures and/or tables were requested, they may be adapted or used in part.
- Please print this page for your records and send a copy of it to your publisher/graduate school.
- Appropriate credit for the requested material should be given as follows: "Reprinted (adapted) with permission from (COMPLETE REFERENCE CITATION). Copyright (YEAR) American Chemical Society." Insert appropriate information in place of the capitalized words.
- One-time permission is granted only for the use specified in your RightsLink request. No additional uses are granted (such as derivative works or other editions). For any uses, please submit a new request.

If credit is given to another source for the material you requested from RightsLink, permission must be obtained from that source.

Buttons for **BACK** and **CLOSE WINDOW** are visible at the bottom of the main content area.

© 2022 Copyright - All Rights Reserved | Copyright Clearance Center, Inc. | Privacy statement | Terms and Conditions  
Comments? We would like to hear from you. Email us at [customer-care@copyright.com](mailto:customer-care@copyright.com)

The Windows taskbar at the bottom shows the search bar, taskbar icons, system tray with weather (42°F Sunny), and date/time (5:31 PM 1/26/2022).

## Ref. 50

Rightlink® by Copyright Clearance Center

100.copyright.com/AppDispatchServlet



**HClO-Activated Fluorescence and Photosensitization from an AIE Nanoprobe for Image-Guided Bacterial Ablation in Phagocytes**

Author: Bin Liu, Guiping Tang, Guobin Qi, et al  
 Publication: Advanced Materials  
 Publisher: John Wiley and Sons  
 Date: Oct 20, 2020  
 © 2020 Wiley-VCH GmbH

**Order Completed**

Thank you for your order.

This Agreement between Ewha Womans University – Van-Nghia Nguyen ("You") and John Wiley and Sons ("John Wiley and Sons") consists of your license details and the terms and conditions provided by John Wiley and Sons and Copyright Clearance Center.

Your confirmation email will contain your order number for future reference.

License Number: 5236370537413 [Printable Details](#)

License date: Jan 26, 2022

| Licensed Content             |                                                                                                                            | Order Details                                                                              |                            |
|------------------------------|----------------------------------------------------------------------------------------------------------------------------|--------------------------------------------------------------------------------------------|----------------------------|
| Licensed Content Publisher   | John Wiley and Sons                                                                                                        | Type of use                                                                                | Journal/Magazine           |
| Licensed Content Publication | Advanced Materials                                                                                                         | Requestor type                                                                             | Publisher (STM Signatory)  |
| Licensed Content Title       | HClO-Activated Fluorescence and Photosensitization from an AIE Nanoprobe for Image-Guided Bacterial Ablation in Phagocytes | STM publisher name                                                                         | Royal Society of Chemistry |
| Licensed Content Author      | Bin Liu, Guiping Tang, Guobin Qi, et al                                                                                    | Is the reuse sponsored by or associated with a pharmaceutical or medical products company? | no                         |
| Licensed Content Date        | Oct 20, 2020                                                                                                               | Format                                                                                     | Print and electronic       |
| Licensed Content Volume      | 32                                                                                                                         | Portion                                                                                    | Figure/Table               |
| Licensed Content Issue       | 47                                                                                                                         | Number of figures/tables                                                                   | 1                          |
| Licensed Content Pages       | 9                                                                                                                          | Will you be translating?                                                                   | No                         |
|                              |                                                                                                                            | Circulation                                                                                | 1 - 29                     |

| About Your Work           |                                                               | Additional Data        |              |
|---------------------------|---------------------------------------------------------------|------------------------|--------------|
| Title of new article      | Organic photosensitizers for antimicrobial phototherapy       | Order reference number | 49           |
| Lead author               | Van-Nghia Nguyen, Zheng Zhao, Ben Zhong Tang and Juysung Yoon | Portions               | Figure 10c,d |
| Title of targeted journal | Chemical Society Reviews                                      |                        |              |
| Publisher                 | Royal Society of Chemistry                                    |                        |              |

Windows search: Type here to search

Taskbar: 40°F Sunny, 5:43 PM 1/26/2022

## Ref. 51

Rightlink® by Copyright Clearance Center

100.copyright.com/AppDispatchServlet



**Phthalocyanine-Assembled Nanodots as Photosensitizers for Highly Efficient Type I Photoreactions in Photodynamic Therapy**

Author: Juysung Yoon, Jian-Dong Huang, Dayoung Lee, et al  
 Publication: Angewandte Chemie International Edition  
 Publisher: John Wiley and Sons  
 Date: Jul 4, 2018  
 © 2018 Wiley-VCH Verlag GmbH & Co. KGaA, Weinheim

**Order Completed**

Thank you for your order.

This Agreement between Ewha Womans University – Van-Nghia Nguyen ("You") and John Wiley and Sons ("John Wiley and Sons") consists of your license details and the terms and conditions provided by John Wiley and Sons and Copyright Clearance Center.

Your confirmation email will contain your order number for future reference.

License Number: 5236371160705 [Printable Details](#)

License date: Jan 26, 2022

| Licensed Content             |                                                                                                                          | Order Details                                                                              |                            |
|------------------------------|--------------------------------------------------------------------------------------------------------------------------|--------------------------------------------------------------------------------------------|----------------------------|
| Licensed Content Publisher   | John Wiley and Sons                                                                                                      | Type of use                                                                                | Journal/Magazine           |
| Licensed Content Publication | Angewandte Chemie International Edition                                                                                  | Requestor type                                                                             | Publisher (STM Signatory)  |
| Licensed Content Title       | Phthalocyanine-Assembled Nanodots as Photosensitizers for Highly Efficient Type I Photoreactions in Photodynamic Therapy | STM publisher name                                                                         | Royal Society of Chemistry |
| Licensed Content Author      | Juysung Yoon, Jian-Dong Huang, Dayoung Lee, et al                                                                        | Is the reuse sponsored by or associated with a pharmaceutical or medical products company? | no                         |
| Licensed Content Date        | Jul 4, 2018                                                                                                              | Format                                                                                     | Print and electronic       |
| Licensed Content Volume      | 57                                                                                                                       | Portion                                                                                    | figure/table               |
| Licensed Content Issue       | 31                                                                                                                       | Number of figures/tables                                                                   | 1                          |
| Licensed Content Pages       | 6                                                                                                                        | Will you be translating?                                                                   | No                         |
|                              |                                                                                                                          | Circulation                                                                                | 1 - 29                     |

| About Your Work           |                                                               | Additional Data        |           |
|---------------------------|---------------------------------------------------------------|------------------------|-----------|
| Title of new article      | Organic photosensitizers for antimicrobial phototherapy       | Order reference number | 50        |
| Lead author               | Van-Nghia Nguyen, Zheng Zhao, Ben Zhong Tang and Juysung Yoon | Portions               | Figure 11 |
| Title of targeted journal | Chemical Society Reviews                                      |                        |           |
| Publisher                 | Royal Society of Chemistry                                    |                        |           |

Windows search: Type here to search

Taskbar: 40°F Sunny, 5:51 PM 1/26/2022

## Ref. 53

RightsLink® by Copyright Clearance Center

Home Help Live Chat Van-Nghia Nguyen

### Bioinspired Heteromultivalent Ligand-Decorated Nanotherapeutic for Enhanced Photothermal and Photodynamic Therapy of Antibiotic-Resistant Bacterial Pneumonia

Author: Yu Zhao, Cong Yu, Yunjian Yu, et al  
 Publication: Applied Materials  
 Publisher: American Chemical Society  
 Date: Oct 1, 2019  
 Copyright © 2019, American Chemical Society

**PERMISSION/LICENSE IS GRANTED FOR YOUR ORDER AT NO CHARGE**

This type of permission/license, instead of the standard Terms and Conditions, is sent to you because no fee is being charged for your order. Please note the following:

- Permission is granted for your request in both print and electronic formats, and translations.
- If figures and/or tables were requested, they may be adapted or used in part.
- Please print this page for your records and send a copy of it to your publisher/graduate school.
- Appropriate credit for the requested material should be given as follows: "Reprinted (adapted) with permission from (COMPLETE REFERENCE CITATION). Copyright (YEAR) American Chemical Society." Insert appropriate information in place of the capitalized words.
- One-time permission is granted only for the use specified in your RightsLink request. No additional uses are granted (such as derivative works or other editions). For any uses, please submit a new request.

If credit is given to another source for the material you requested from RightsLink, permission must be obtained from that source.

BACK CLOSE WINDOW

© 2022 Copyright - All Rights Reserved | Copyright Clearance Center, Inc. | Privacy statement | Terms and Conditions  
 Comments? We would like to hear from you. E-mail us at [customerscare@copyright.com](mailto:customerscare@copyright.com)

## Ref. 54

Antibacterial Narrow-Band-Gap Conjugated Oligoelectrolytes with High Photothermal Conversion Efficiency

Author: Guillermo C. Bazan, Bin Liu, Ming Wang, et al  
 Publication: Angewandte Chemie International Edition  
 Publisher: John Wiley and Sons  
 Date: Nov 15, 2017  
 © 2017 Wiley-VCH Verlag GmbH & Co. KGaA, Weinheim

**Saved Quote**

This quote will be kept until the Expiration Date listed below. You may complete the purchase of this Saved Quote by selecting the "Complete Purchase" option below or visiting [MyAccount.copyright.com](http://MyAccount.copyright.com) at a later time. If no action is taken before the expiration deadline this quote will expire.

|                              |                                                                                                         |                                                                                            |                                                               |                            |
|------------------------------|---------------------------------------------------------------------------------------------------------|--------------------------------------------------------------------------------------------|---------------------------------------------------------------|----------------------------|
| Quote Number                 | 501705947                                                                                               | Order Details                                                                              | Type of use                                                   | Journal/Magazine           |
| Quote Date                   | Jan 26, 2022                                                                                            | Requestor type                                                                             | Requester type                                                | Publisher (STM Signatory)  |
| Expiration Date              | Mar 27, 2022                                                                                            | STM publisher name                                                                         | STM publisher name                                            | Royal Society of Chemistry |
| <b>Licensed Content</b>      |                                                                                                         | Is the reuse sponsored by or associated with a pharmaceutical or medical products company? | no                                                            |                            |
| Licensed Content Publisher   | John Wiley and Sons                                                                                     | Format                                                                                     | Print and electronic                                          |                            |
| Licensed Content Publication | Angewandte Chemie International Edition                                                                 | Portion                                                                                    | Figure/table                                                  |                            |
| Licensed Content Title       | Antibacterial Narrow-Band-Gap Conjugated Oligoelectrolytes with High Photothermal Conversion Efficiency | Number of figures/tables                                                                   | 1                                                             |                            |
| Licensed Content Author      | Guillermo C. Bazan, Bin Liu, Ming Wang, et al                                                           | Will you be translating?                                                                   | No                                                            |                            |
| Licensed Content Date        | Nov 15, 2017                                                                                            | Circulation                                                                                | 1 - 29                                                        |                            |
| Licensed Content Volume      | 56                                                                                                      | <b>About Your Work</b>                                                                     |                                                               |                            |
| Licensed Content Issue       | 50                                                                                                      | Title of new article                                                                       | Organic photosensitizers for antimicrobial phototherapy       |                            |
| Licensed Content Pages       | 4                                                                                                       | Lead author                                                                                | Van-Nghia Nguyen, Zheng Zhao, Ben Zhong Tang and Juysung Yoon |                            |
|                              |                                                                                                         | Title of targeted journal                                                                  | Chemical Society Reviews                                      |                            |
|                              |                                                                                                         | Publisher                                                                                  | Royal Society of Chemistry                                    |                            |
|                              |                                                                                                         | Publisher imprint                                                                          | RSC                                                           |                            |
|                              |                                                                                                         | Expected publication date                                                                  | Feb 2022                                                      |                            |
|                              |                                                                                                         | <b>Additional Data</b>                                                                     |                                                               |                            |
|                              |                                                                                                         | Order reference number                                                                     | 53                                                            |                            |
|                              |                                                                                                         | Portions                                                                                   | Figure 13                                                     |                            |

## Ref. 55

Rightlink® by Copyright Clearance Center

100.copyright.com/AppDispatchServlet

**Acidity-triggered charge-convertible nanoparticles that can cause bacterium-specific aggregation in situ to enhance photothermal ablation of focal infection**

Author: Chiranjeevi Korupalli, Chieh-Cheng Huang, Wei-Chih Lin, Wen-Yu Pan, Po-Yen Lin, Wei-Lin Wan, Meng-Ju Li, Yen-Chang Hsing, Wen-Sung Sung  
 Publication: Biomaterials  
 Publisher: Elsevier  
 Date: February 2017  
 © 2016 Elsevier Ltd. All rights reserved.

**Review Order**

Please review the order details and the associated terms and conditions.

No royalties will be charged for this reuse request although you are required to obtain a license and comply with the license terms and conditions. To obtain the license, click the Accept button below.

| Licensed Content             |                                                                                                                                                              | Order Details                                |                              |
|------------------------------|--------------------------------------------------------------------------------------------------------------------------------------------------------------|----------------------------------------------|------------------------------|
| Licensed Content Publisher   | Elsevier                                                                                                                                                     | Type of Use                                  | reuse in a journal/magazine  |
| Licensed Content Publication | Biomaterials                                                                                                                                                 | Requestor type                               | publisher                    |
| Licensed Content Title       | Acidity-triggered charge-convertible nanoparticles that can cause bacterium-specific aggregation in situ to enhance photothermal ablation of focal infection | Portion                                      | figures/tables/illustrations |
| Licensed Content Author      | Chiranjeevi Korupalli, Chieh-Cheng Huang, Wei-Chih Lin, Wen-Yu Pan, Po-Yen Lin, Wei-Lin Wan, Meng-Ju Li, Yen-Chang Hsing, Wen-Sung Sung                      | Number of figures/tables/illustrations       | 1                            |
| Licensed Content Date        | February 2017                                                                                                                                                | Format                                       | both print and electronic    |
| Licensed Content Volume      | 116                                                                                                                                                          | Are you the author of this Elsevier article? | No                           |
| Licensed Content Issue       | n/a                                                                                                                                                          | Will you be translating?                     | No                           |
| Licensed Content Pages       | 9                                                                                                                                                            |                                              |                              |

| About Your Work           |                                                               | Additional Data        |            |
|---------------------------|---------------------------------------------------------------|------------------------|------------|
| Title of new article      | Organic photosensitizers for antimicrobial phototherapy       | Order reference number | 54         |
| Lead author               | Van-Nghia Nguyen, Zheng Zhao, Ben Zhong Tang and Juyoung Yoon | Portions               | Figure 14a |
| Title of targeted journal | Chemical Society Reviews                                      |                        |            |
| Publisher                 | Royal Society of Chemistry                                    |                        |            |
| Publisher imprint         | RSC                                                           |                        |            |
| Expected publication date | Feb 2022                                                      |                        |            |

Requestor Location

Tax Details

Type here to search

40°F Sunny 6:10 PM 1/26/2022

## Ref. 56

Rightlink® by Copyright Clearance Center

100.copyright.com/AppDispatchServlet

**Supramolecular Radical Anions Triggered by Bacteria In Situ for Selective Photothermal Therapy**

Author: Xi Zhang, Jiang-Fei Xu, Shu Wang, et al  
 Publication: Angewandte Chemie International Edition  
 Publisher: John Wiley and Sons  
 Date: Nov 28, 2017  
 © 2017 Wiley-VCH Verlag GmbH & Co. KGaA, Weinheim

**Order Completed**

Thank you for your order.

This Agreement between Ewha Womans University – Van-Nghia Nguyen ("You") and John Wiley and Sons ("John Wiley and Sons") consists of your license details and the terms and conditions provided by John Wiley and Sons and Copyright Clearance Center.

Your confirmation email will contain your order number for future reference.

License Number: 5296381005950 [Printable Details](#)

License date: Jan 26, 2022

| Licensed Content             |                                                                                                | Order Details                                                                              |                            |
|------------------------------|------------------------------------------------------------------------------------------------|--------------------------------------------------------------------------------------------|----------------------------|
| Licensed Content Publisher   | John Wiley and Sons                                                                            | Type of use                                                                                | Journal/Magazine           |
| Licensed Content Publication | Angewandte Chemie International Edition                                                        | Requestor type                                                                             | Publisher (STM Signatory)  |
| Licensed Content Title       | Supramolecular Radical Anions Triggered by Bacteria In Situ for Selective Photothermal Therapy | STM publisher name                                                                         | Royal Society of Chemistry |
| Licensed Content Author      | Xi Zhang, Jiang-Fei Xu, Shu Wang, et al                                                        | Is the reuse sponsored by or associated with a pharmaceutical or medical products company? | no                         |
| Licensed Content Date        | Nov 28, 2017                                                                                   | Format                                                                                     | Print and electronic       |
| Licensed Content Volume      | 56                                                                                             | Portion                                                                                    | figure/table               |
| Licensed Content Issue       | 51                                                                                             | Number of figures/tables                                                                   | 1                          |
| Licensed Content Pages       | 4                                                                                              | Will you be translating?                                                                   | No                         |
|                              |                                                                                                | Circulation                                                                                | 1 - 29                     |

| About Your Work           |                                                               | Additional Data        |            |
|---------------------------|---------------------------------------------------------------|------------------------|------------|
| Title of new article      | Organic photosensitizers for antimicrobial phototherapy       | Order reference number | 55         |
| Lead author               | Van-Nghia Nguyen, Zheng Zhao, Ben Zhong Tang and Juyoung Yoon | Portions               | Figure 14b |
| Title of targeted journal | Chemical Society Reviews                                      |                        |            |
| Publisher                 | Royal Society of Chemistry                                    |                        |            |

Type here to search

40°F Sunny 6:14 PM 1/26/2022

## Ref. 60

RightsLink® by Copyright Clearance Center

st100.copyright.com/AppDispatchServlet

**NIR-II emissive multifunctional AIEgen with single laser-activated synergistic photodynamic/photothermal therapy of cancers and pathogens**  
 Author: Yuling Xu,Yi Zhang,Jun Li,Jusung An,Chonglu Li,Suya Bai,Amit Sharma,Ganzen Deng,Jong Seung Kim,Yao Sun  
 Publication: Biomaterials  
 Publisher: Elsevier  
 Date: November 2020  
 © 2020 Elsevier Ltd. All rights reserved.

**Order Completed**

Thank you for your order.  
 This Agreement between Ewha Womans University – Van-Nghia Nguyen ("You") and Elsevier ("Elsevier") consists of your license details and the terms and conditions provided by Elsevier and Copyright Clearance Center.

Your confirmation email will contain your order number for future reference.

License Number: 5296381481515 [Printable Details](#)

License date: Jan 26, 2022

| Licensed Content             |                                                                                                                                           | Order Details                                |                              |
|------------------------------|-------------------------------------------------------------------------------------------------------------------------------------------|----------------------------------------------|------------------------------|
| Licensed Content Publisher   | Elsevier                                                                                                                                  | Type of Use                                  | reuse in a journal/magazine  |
| Licensed Content Publication | Biomaterials                                                                                                                              | Requestor type                               | publisher                    |
| Licensed Content Title       | NIR-II emissive multifunctional AIEgen with single laser-activated synergistic photodynamic/photothermal therapy of cancers and pathogens | Portion                                      | figures/tables/illustrations |
| Licensed Content Author      | Yuling Xu,Yi Zhang,Jun Li,Jusung An,Chonglu Li,Suya Bai,Amit Sharma,Ganzen Deng,Jong Seung Kim,Yao Sun                                    | Number of figures/tables/illustrations       | 1                            |
| Licensed Content Date        | Nov 1, 2020                                                                                                                               | Format                                       | both print and electronic    |
| Licensed Content Volume      | 259                                                                                                                                       | Are you the author of this Elsevier article? | No                           |
| Licensed Content Issue       | n/a                                                                                                                                       | Will you be translating?                     | No                           |
| Licensed Content Pages       | 1                                                                                                                                         |                                              |                              |

| About Your Work           |                                                               | Additional Data        |            |
|---------------------------|---------------------------------------------------------------|------------------------|------------|
| Title of new article      | Organic photosensitizers for antimicrobial phototherapy       | Order reference number | 59         |
| Lead author               | Van-Nghia Nguyen, Zheng Zhao, Ben Zhong Tang and Juysung Yoon | Portions               | Figure 15b |
| Title of targeted journal | Chemical Society Reviews                                      |                        |            |
| Publisher                 | Royal Society of Chemistry                                    |                        |            |
| Publisher Imprint         | RSC                                                           |                        |            |

Windows taskbar: 35°F Sunny, 6:23 PM 1/26/2022

## Ref. 70

RightsLink® by Copyright Clearance Center

st100.copyright.com/AppDispatchServlet#formTop

**CCC RightsLink®** Home Help Live Chat Van-Nghia Nguyen

**Synergistic Effect of Zanamivir–Porphyrin Conjugates on Inhibition of Neuraminidase and Inactivation of Influenza Virus**  
 Author: Wen-Hsien Wen, Mengli Lin, Ching-Yao Su, et al  
 Publication: Journal of Medicinal Chemistry  
 Publisher: American Chemical Society  
 Date: Aug 1, 2009  
 Copyright © 2009, American Chemical Society

**PERMISSION/LICENSE IS GRANTED FOR YOUR ORDER AT NO CHARGE**

This type of permission/license, instead of the standard Terms and Conditions, is sent to you because no fee is being charged for your order. Please note the following:

- Permission is granted for your request in both print and electronic formats, and translations.
- If figures and/or tables were requested, they may be adapted or used in part.
- Please print this page for your records and send a copy of it to your publisher/graduate school.
- Appropriate credit for the requested material should be given as follows: "Reprinted (adapted) with permission from (COMPLETE REFERENCE CITATION). Copyright (YEAR) American Chemical Society." Insert appropriate information in place of the capitalized words.
- One-time permission is granted only for the use specified in your RightsLink request. No additional uses are granted (such as derivative works or other editions). For any uses, please submit a new request.

If credit is given to another source for the material you requested from RightsLink, permission must be obtained from that source.

[BACK](#) [CLOSE WINDOW](#)

© 2022 Copyright - All Rights Reserved | Copyright Clearance Center, Inc. | Privacy statement | Terms and Conditions  
 Comments? We would like to hear from you. E-mail us at [customerscare@copyright.com](mailto:customerscare@copyright.com)

Windows taskbar: 35°F Sunny, 6:28 PM 1/26/2022

## Ref. 71



RightsLink® by Copyright Clearance Center

st100.copyright.com/AppDispatchServlet



**A Multiligand Architectural Photosensitizer That Targets Hemagglutinin on Envelope of Influenza Virus for Photodynamic Inactivation**  
 Author: Kun Na, Jangsu Lee, Jeongju Lee, et al  
 Publication: Small  
 Publisher: John Wiley and Sons  
 Date: Apr 24, 2020  
 © 2020 WILEY-VCH Verlag GmbH & Co. KGaA, Weinheim

**Order Completed**

Thank you for your order.

This Agreement between Ewha Womans University – Van-Nghia Nguyen ("You") and John Wiley and Sons ("John Wiley and Sons") consists of your license details and the terms and conditions provided by John Wiley and Sons and Copyright Clearance Center.

Your confirmation email will contain your order number for future reference.

|                |               |                                   |
|----------------|---------------|-----------------------------------|
| License Number | 5236390579815 | <a href="#">Printable Details</a> |
| License date   | Jan 26, 2022  |                                   |

**Licensed Content**

|                              |                                                                                                                                     |
|------------------------------|-------------------------------------------------------------------------------------------------------------------------------------|
| Licensed Content Publisher   | John Wiley and Sons                                                                                                                 |
| Licensed Content Publication | Small                                                                                                                               |
| Licensed Content Title       | A Multiligand Architectural Photosensitizer That Targets Hemagglutinin on Envelope of Influenza Virus for Photodynamic Inactivation |
| Licensed Content Author      | Kun Na, Jangsu Lee, Jeongju Lee, et al                                                                                              |
| Licensed Content Date        | Apr 24, 2020                                                                                                                        |
| Licensed Content Volume      | 16                                                                                                                                  |
| Licensed Content Issue       | 20                                                                                                                                  |
| Licensed Content Pages       | 11                                                                                                                                  |

**Order Details**

|                                                                                            |                            |
|--------------------------------------------------------------------------------------------|----------------------------|
| Type of use                                                                                | Journal/Magazine           |
| Requestor type                                                                             | Publisher (STM Signatory)  |
| STM publisher name                                                                         | Royal Society of Chemistry |
| Is the reuse sponsored by or associated with a pharmaceutical or medical products company? | no                         |
| Format                                                                                     | Print and electronic       |
| Portion                                                                                    | Figure/Table               |
| Number of figures/tables                                                                   | 1                          |
| Will you be translating?                                                                   | No                         |
| Circulation                                                                                | 1 - 29                     |

**About Your Work**

|                           |                                                               |
|---------------------------|---------------------------------------------------------------|
| Title of new article      | Organic photosensitizers for antimicrobial phototherapy       |
| Lead author               | Van-Nghia Nguyen, Zheng Zhao, Ben Zhong Tang and Juyoung Yoon |
| Title of targeted journal | Chemical Society Reviews                                      |
| Publisher                 | Royal Society of Chemistry                                    |

**Additional Data**

|                        |           |
|------------------------|-----------|
| Order reference number | 70        |
| Portions               | Figure 19 |

## Ref. 75

RightsLink® by Copyright Clearance Center

st100.copyright.com/AppDispatchServlet#formTop

**CCC RightsLink®**

Home | Help | Live Chat | Van-Nghia Nguyen

**Chemical Molecule-Induced Light-Activated System for Anticancer and Antifungal Activities**  
 Author: Huanxiang Yuan, Hui Chong, Bing Wang, et al  
 Publication: Journal of the American Chemical Society  
 Publisher: American Chemical Society  
 Date: Aug 1, 2012  
 Copyright © 2012, American Chemical Society

**PERMISSION/LICENSE IS GRANTED FOR YOUR ORDER AT NO CHARGE**

This type of permission/license, instead of the standard Terms and Conditions, is sent to you because no fee is being charged for your order. Please note the following:

- Permission is granted for your request in both print and electronic formats, and translations.
- If figures and/or tables were requested, they may be adapted or used in part.
- Please print this page for your records and send a copy of it to your publisher/graduate school.
- Appropriate credit for the requested material should be given as follows: "Reprinted (adapted) with permission from (COMPLETE REFERENCE CITATION). Copyright (YEAR) American Chemical Society." Insert appropriate information in place of the capitalized words.
- One-time permission is granted only for the use specified in your RightsLink request. No additional uses are granted (such as derivative works or other editions). For any uses, please submit a new request.

If credit is given to another source for the material you requested from RightsLink, permission must be obtained from that source.

[BACK](#) [CLOSE WINDOW](#)

© 2022 Copyright - All Rights Reserved | Copyright Clearance Center, Inc. | Privacy statement | Terms and Conditions  
 Comments? We would like to hear from you. E-mail us at [customerscare@copyright.com](mailto:customerscare@copyright.com)
